# Supplementary material for: Effect of COVID-19 on smoking cessation outcomes in a large primary care treatment programme: an observational study
Source: HighWire-hosted journal article supplement (doi:10.1136/bmjopen-2021-053075), 2021-08-01

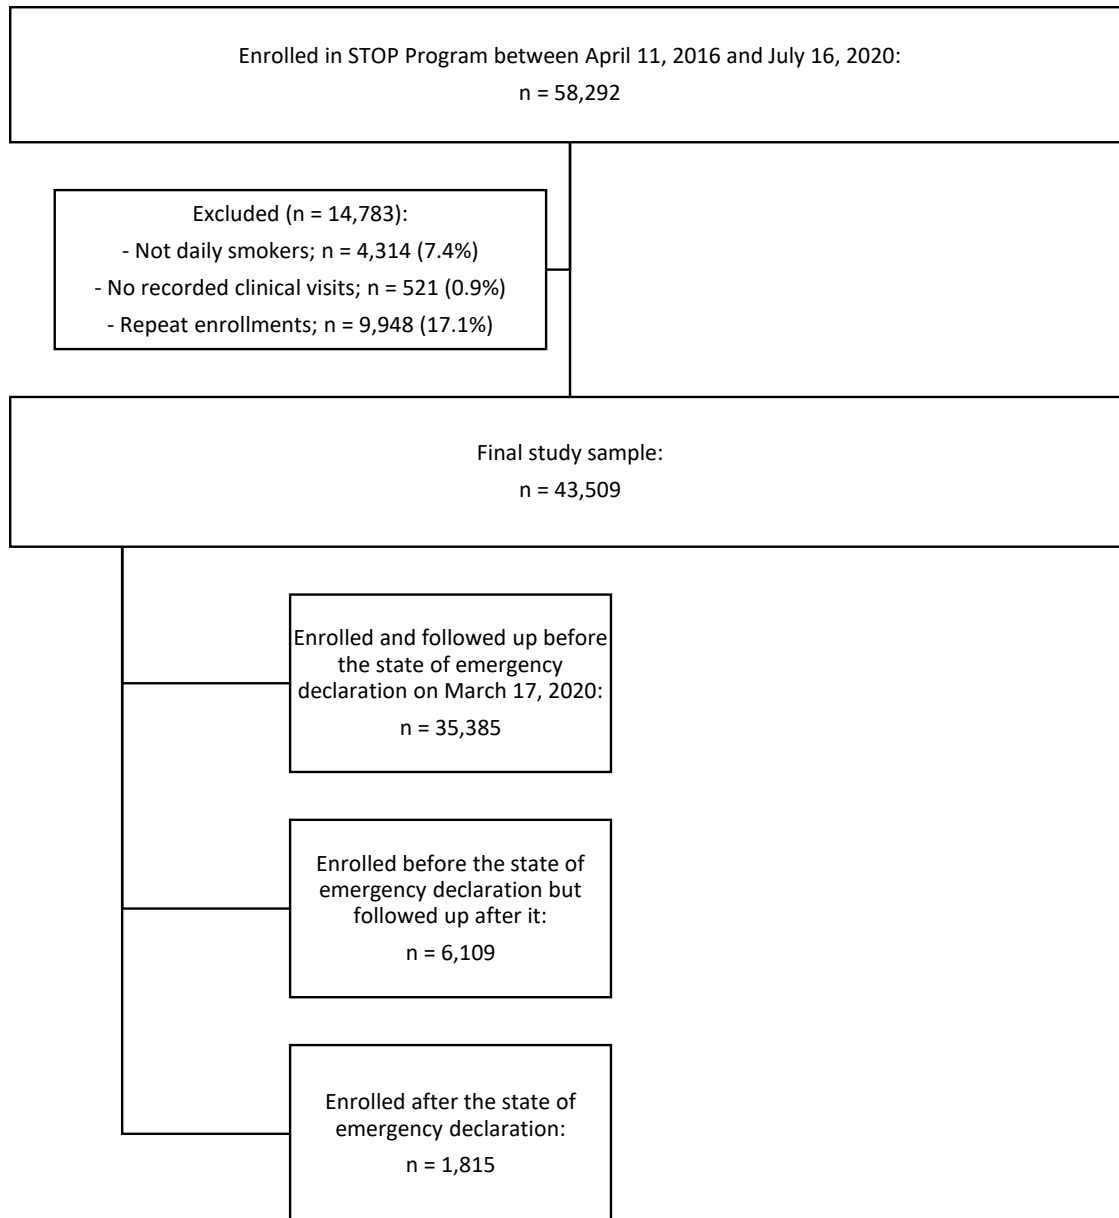

Supplement: bmjopen-2021-053075supp001_data_supplement.pdf [file bmjopen-2021-053075supp001_data_supplement.pdf]
